# Supplementary figures and images for: Optimizing Crop Production with Bacterial Inputs: Insights into Chemical Dialogue between Sphingomonas sediminicola and Pisum sativum
Source: MDPI journal article supplement (doi:10.3390/microorganisms11071847), 2023-07-21

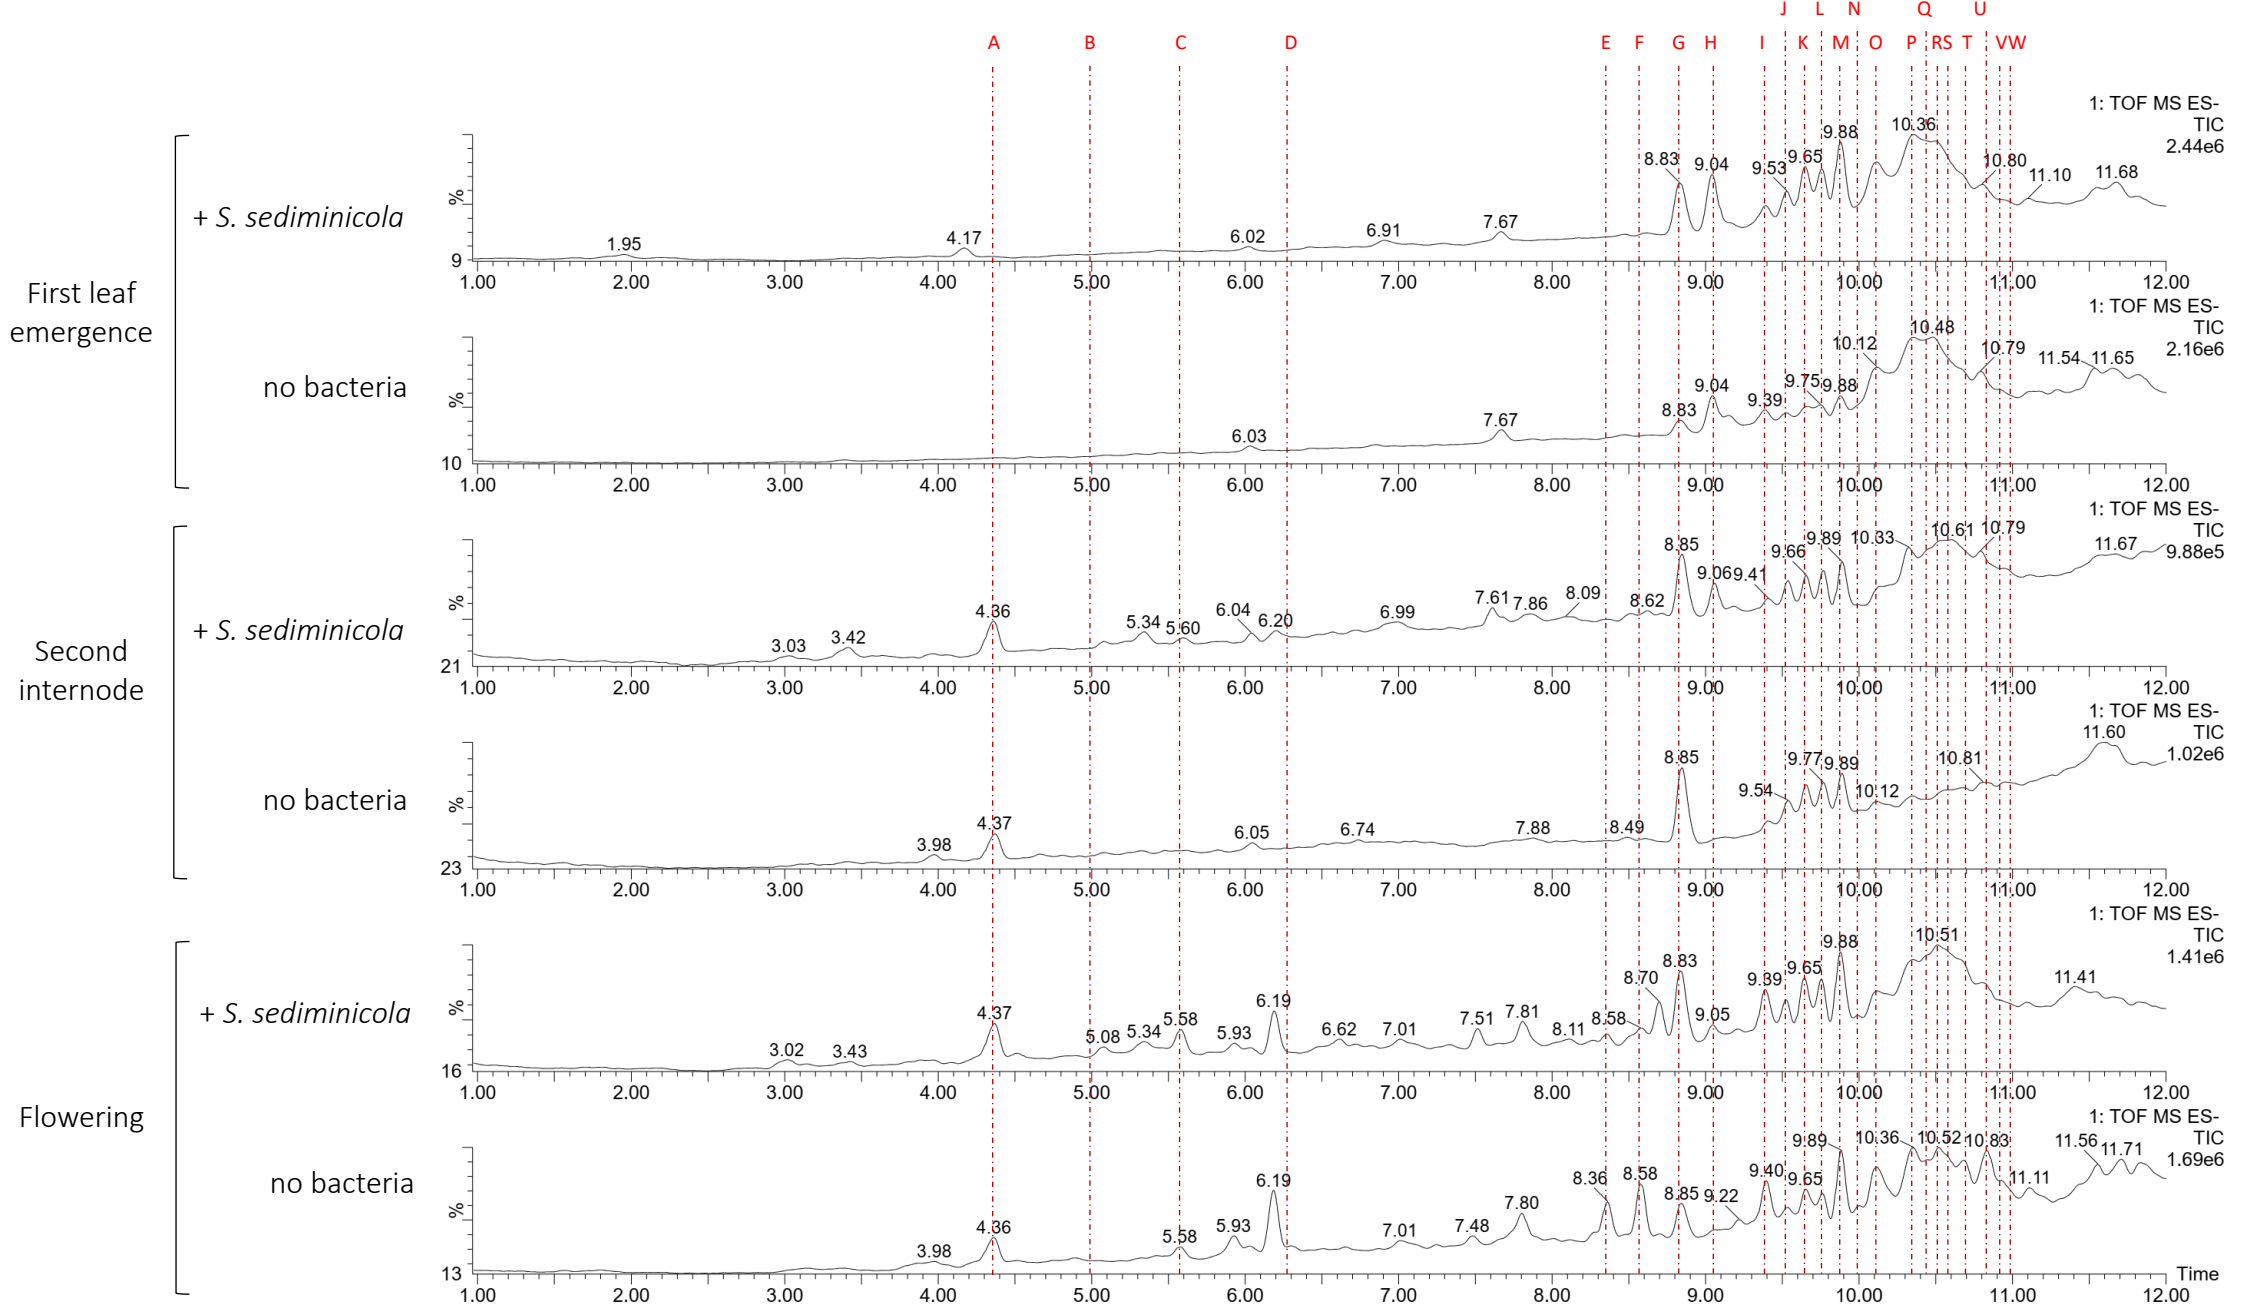

Supplement: s1 [file s1]

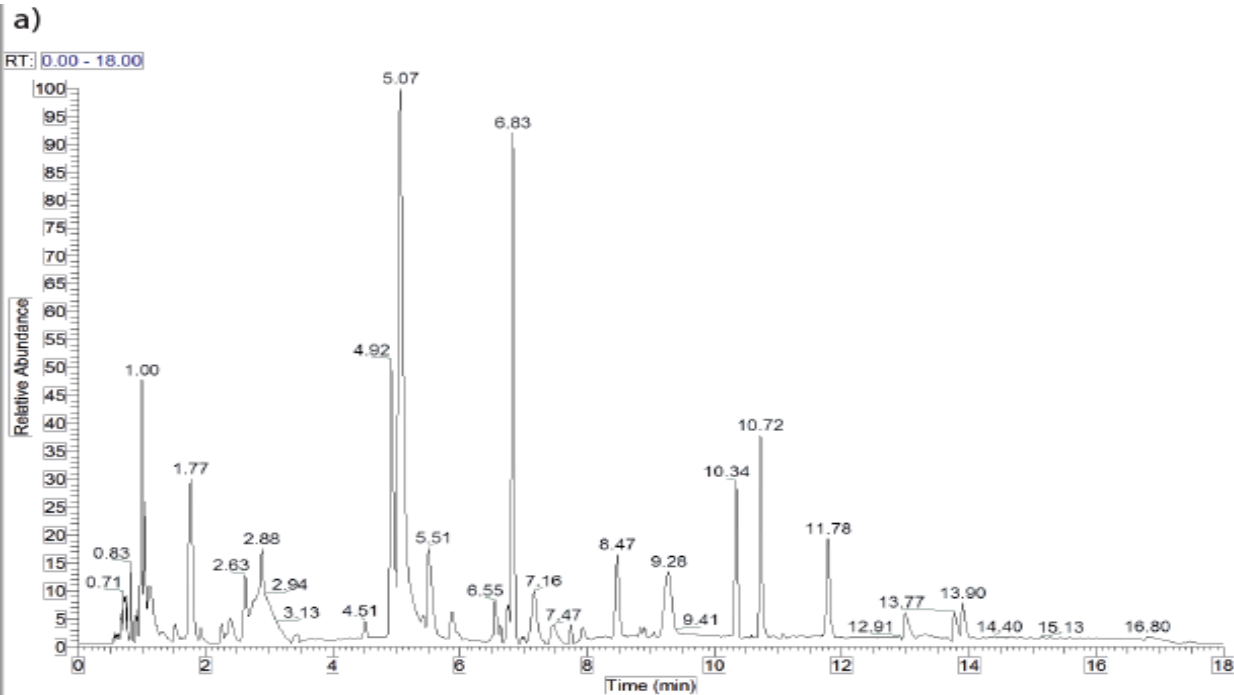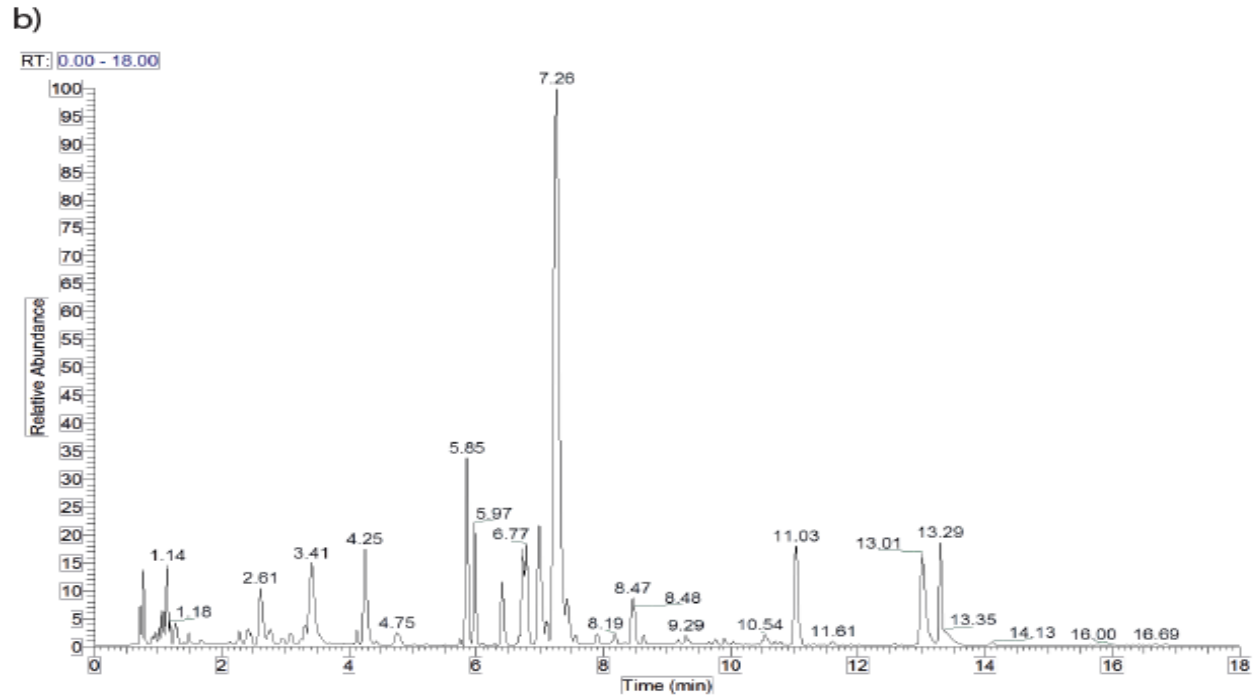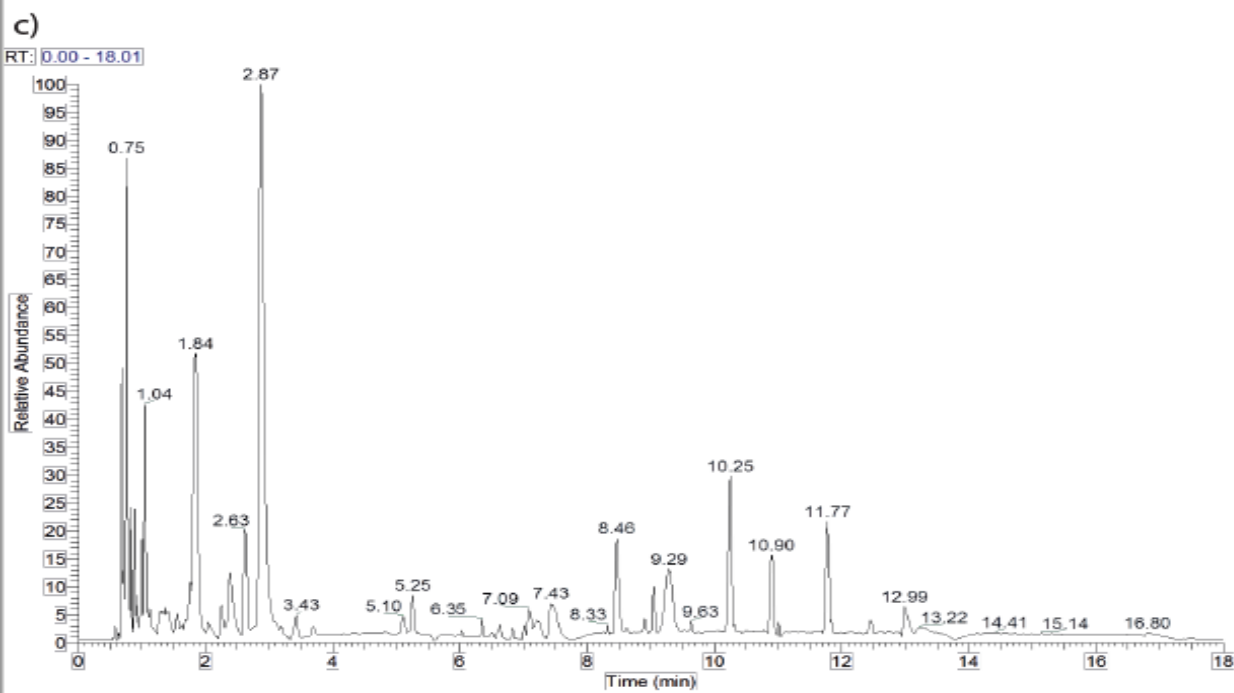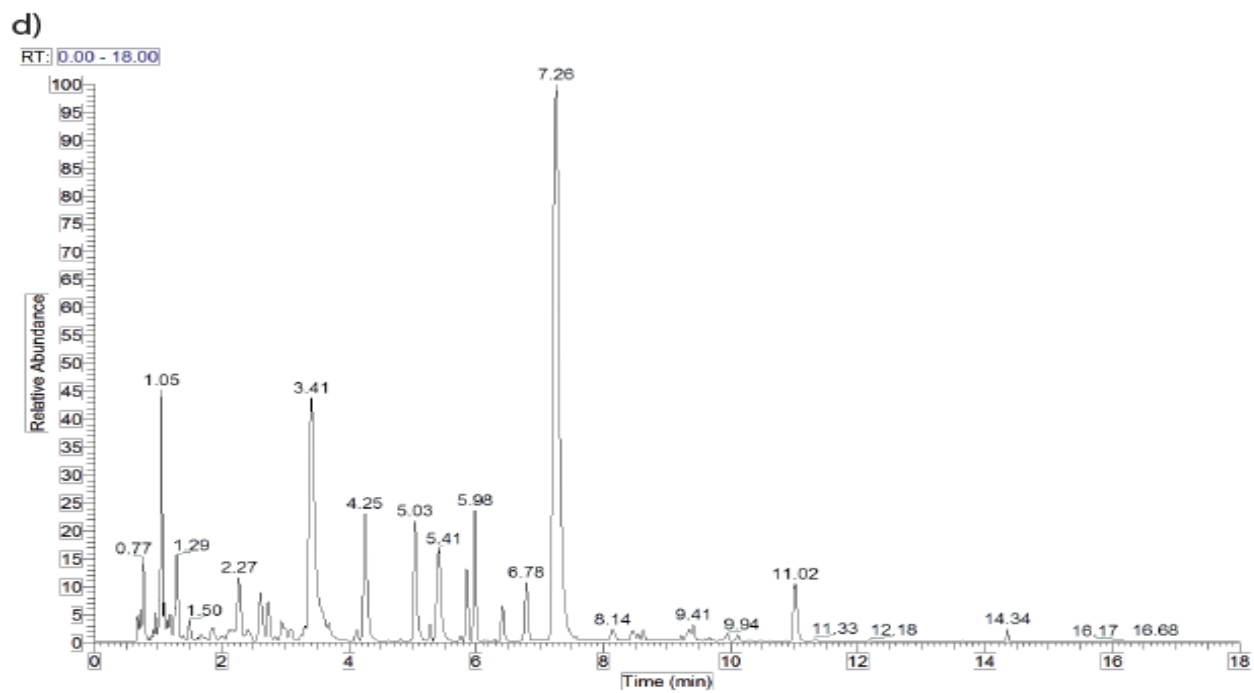

Supplement: s1 [file s1]
